# Supplementary material for: Yolk Fatty Acid Content, Lipid Health Indices, and Oxidative Stability in Eggs of Slow-Growing Sasso Chickens Fed on Flaxseed Supplemented with Plant Polyphenol Extracts
Source: MDPI journal article supplement (doi:10.3390/foods12091819), 2023-04-27
Supplement: s1 [file s1]

Table S1. The effects of feeding plant polyphenol extracts and flaxseed on fat content and fatty acid concentrations in the raw egg yolks of slow growing Sasso chickens

| Fatty acids<br>(mg/g) | ¹Treatments       |                |                    |                |                    |                |                    |                |                    |                           | Random<br>effect | p-value       |
|-----------------------|-------------------|----------------|--------------------|----------------|--------------------|----------------|--------------------|----------------|--------------------|---------------------------|------------------|---------------|
|                       | FS                |                | VE8                |                | DA8                |                | TS8                |                | CD8                |                           |                  |               |
|                       | Mean              | 95% [LCL, UCL] | Mean               | 95% [LCL, UCL] | Mean               | 95% [LCL, UCL] | Mean               | 95% [LCL, UCL] | Mean               | 95% [LCL, UCL]            |                  |               |
| C14:0                 | 0.80              | [0.72, 0.86]   | 0.78               | [ 0.70, 0.85]  | 0.82               | [0.74, 0.89]   | 0.77               | [0.69, 0.84]   | 0.80               | [0.73, 0.87]              | non 0            | 0.8556        |
| C15:0                 | 0.15              | [0.13, 0.16]   | 0.17               | [0.15, 0.18]   | 0.16               | [0.14, 0.17]   | 0.18               | [0.16, 0.19]   | 0.16               | [0.144, 0.17]             | non 0            | <b>0.2704</b> |
| C16:0                 | 63.9              | [61.1, 66.7]   | 65.2               | [62.4, 68.0]   | 66.3               | [63.6, 69.1]   | 64.0               | [61.3, 66.8]   | 65.5               | [62.7, 68.3]              | non 0            | 0.6833        |
| C17:0                 | 0.49              | [0.43, 0.53]   | 0.55               | [0.50, 0.60]   | 0.50               | [0.45, 0.55]   | 0.58               | [0.53, 0.63]   | 0.51               | [0.45, 0.55]              | non 0            | 0.06333       |
| C18:0                 | 22.7              | [21.6, 23.9]   | 21.5               | [20.3 , 22.6]  | 22.2               | [21.0, 23.3]   | <b>23.1</b>        | [21.9 , 24.2]  | 22.7               | [21.5 , 23.9]             | 0                | 0.33209       |
| C20:0                 | 0.07              | [0.06, 0.08]   | 0.07               | [0.07, 0.08]   | 0.08               | [0.07, 0.08]   | 0.08               | [0.07, 0.08]   | 0.08               | [0.07, 0.08]              | non 0            | 0.5951        |
| C23:0                 | 0.07              | [0.05, 0.09]   | 0.08               | [0.06, 0.09]   | 0.09               | [0.07, 0.11]   | 0.08               | [0.06, 0.10]   | 0.08               | [0.07, 0.11]              | non 0            | 0.5100        |
| C14:1cis-9            | 0.15              | [0.12, 0.18]   | 0.14               | [0.11, 0.17]   | 0.17               | [0.14, 0.20]   | 0.14               | [0.11, 0.17]   | 0.16               | [0.13, 0.19] <sup>1</sup> | non 0            | 0.4706        |
| C16:1cis-9            | 6.97              | [6.17, 7.78]   | 6.68               | [5.87, 7.49]   | 7.57               | [6.76, 8.38]   | 6.58               | [5.77, 7.39]   | 7.31               | [6.50, 8.12]              | non 0            | 0.3638        |
| C18:1trans-9          | 0.19              | [0.16, 0.22]   | 0.21               | [0.18, 0.24]   | 0.22               | [0.18, 0.24]   | 0.22               | [0.18, 0.25]   | 0.22               | [0.18, 0.25]              | non 0            | 0.7892        |
| C18:1cis-9            | 105               | [101, 109]     | 104                | [100, 108]     | 105                | [101, 109]     | 105                | [101, 109]     | 106                | [102, 110]                | 0                | 0.9835        |
| C18:1trans-11         | 0.22              | [0.20, 0.24]   | 0.19               | [0.17, 0.21]   | 0.18               | [0.16, 0.20]   | 0.19               | [0.17, 0.21]   | 0.19               | [ 0.17, 0.21]             | 0                | 0.0789        |
| C18:1cis-11           | 4.75              | [4.43, 5.07]   | 4.62               | [4.30, 4.93]   | 4.84               | [4.53, 5.16]   | 4.72               | [4.40, 5.04]   | 4.93               | [4.61, 5.25]              | non 0            | 0.6624        |
| C18:2n-6              | 33.7              | [30.9, 36.5]   | 37.2               | [34.4, 40.1]   | 35.6               | [32.8, 38.4]   | 38.8               | [36.0, 41.6]   | 36.2               | [33.4, 39.1]              | non 0            | 0.1383        |
| C18:3n-6              | 0.166             | [0.15, 0.18]   | 0.19               | [0.17, 0.20]   | 0.18               | [0.16, 0.19]   | 0.19               | [0.17, 0.20]   | 0.18               | [0.16, 0.19]              | non 0            | 0.1922        |
| C18:3n-3              | 6.60              | [5.39, 7.80]   | 6.56               | [5.36, 7.77]   | 7.63               | [6.43, 8.83]   | 8.51               | [7.31, 9.72]   | 8.08               | [6.88, 9.28]              | non 0            | 0.0981        |
| C18:2cis 9-trans-11   | 0.16              | [0.12, 0.19]   | 0.15               | [0.11, 0.18]   | 0.18               | [0.15, 0.22]   | 0.19               | [0.16, 0.22]   | 0.15               | [ 0.11, 0.18]             | non 0            | 0.1649        |
| C18:4n-3              | 0.07              | [0.05, 0.08]   | 0.07               | [0.05, 0.08]   | 0.07               | [0.06, 0.08]   | 0.09               | [0.07, 0.10]   | 0.08               | [0.07, 0.09]              | non 0            | 0.2717        |
| C20:2n-6              | 0.29              | [0.25, 0.32]   | 0.32               | [0.28, 0.35]   | 0.31               | [0.27, 0.34]   | 0.33               | [0.29, 0.36]   | 0.31               | [0.28, 0.34]              | non 0            | 0.6406        |
| C20:3n-6              | 0.34              | [0.31, 0.37]   | 0.34               | [0.31, 0.36]   | 0.35               | [0.32, 0.37]   | 0.35               | [0.32, 0.37]   | 0.36               | [0.33, 0.39]              | non 0            | 0.7336        |
| C20:3n-9              | 0.06              | [ 0.04, 0.07]  | 0.06               | [0.04, 0.07]   | 0.06               | [0.04, 0.07]   | 0.07               | [0.05, 0.08]   | 0.05               | [0.04, 0.06]              | non 0            | 0.7791        |
| C20:3n-3              | 0.13              | [0.10, 0.14]   | 0.12               | [0.10, 0.14]   | 0.15               | [0.13, 0.17]   | 0.15               | [0.13, 0.17]   | 0.15               | [0.13, 0.17]              | non 0            | 0.05859       |
| C20:4n-6              | 3.79              | [3.52, 4.07]   | 4.09               | [3.81, 4.37]   | 3.65               | [3.37, 3.93]   | 4.09               | [3.81, 4.37]   | 4.00               | [3.73, 4.28]              | non 0            | 0.1045        |
| C20:5n-3              | 0.16 <sup>a</sup> | [0.14, 0.18]   | 0.16 <sup>a</sup>  | [0.13, 0.17]   | 0.20 <sup>b</sup>  | [0.17, 0.22]   | 0.21 <sup>b</sup>  | [0.18, 0.23]   | 0.21 <sup>b</sup>  | [0.19, 0.23]              | 0                | 0.00035       |
| C22:4n-6              | 0.41              | [0.34, 0.48]   | 0.48               | [0.41, 0.55]   | 0.47               | [0.39, 0.53]   | 0.43               | [0.36, 0.50]   | 0.42               | [0.35, 0.49]              | non 0            | 0.5725        |
| C22:5n-6              | 0.38              | [0.19, 0.57]   | 0.45               | [0.26, 0.64]   | 0.33               | [0.14, 0.52]   | 0.24               | [0.04, 0.42]   | 0.24               | [0.05, 0.43]              | non 0            | 0.4092        |
| C22:5n-3              | 0.81 <sup>a</sup> | [0.60, 1.02]   | 0.95 <sup>a</sup>  | [0.75, 1.16]   | 1.29 <sup>b</sup>  | [1.08, 1.50]   | 1.07 <sup>ab</sup> | [0.86, 1.27]   | 1.08 <sup>ab</sup> | [0.87, 1.29]              | non 0            | 0.0338        |
| C22:6n-3              | 5.96 <sup>a</sup> | [5.51, 6.42]   | 6.31 <sup>ab</sup> | [5.86, 6.77]   | 6.50 <sup>ab</sup> | [6.04, 6.95]   | 7.39 <sup>c</sup>  | [6.93, 7.84]   | 6.93 <sup>cb</sup> | [6.47, 7.38]              | non 0            | 0.00118       |
| ²ΣSFA                 | 88.2              | [84.9, 91.6]   | 88.4               | [85.1, 91.7]   | 90.2               | [86.9, 93.5]   | 88.8               | [85.5, 92.1]   | 89.9               | [86.5, 93.2]              | non 0            | 0.8785        |
| ³ΣMUFA                | 117               | [113, 122]     | 116                | [112, 120]     | 118                | [114, 122]     | 117                | [113, 121]     | 119                | [115, 123]                | 0                | 0.9255        |
| ⁴Σ PUFA               | 53.1 <sup>a</sup> | [49.2, 56.9]   | 57.5 <sup>ab</sup> | [53.6, 61.3]   | 57.0 <sup>ab</sup> | [53.1, 60.8]   | 62.1 <sup>b</sup>  | [58.3, 66.0]   | 58.5 <sup>b</sup>  | [54.7, 62.4]              | non 0            | 0.0366        |
| Σ n-3 PUFA            | 13.7 <sup>a</sup> | [12.1, 15.3]   | 14.2 <sup>a</sup>  | [12.6, 15.8]   | 15.8 <sup>ab</sup> | [14.2, 17.4]   | 17.4 <sup>b</sup>  | [15.8, 19.0]   | 16.5 <sup>b</sup>  | [14.9, 18.1]              | non 0            | 0.01226       |
| Σ n-6 PUFA            | 39.1              | [36.3, 41.9]   | 43.1               | [40.3, 45.9]   | 40.9               | [38.0, 43.7]   | 44.5               | [41.6, 47.3]   | 41.8               | [38.9, 44.6]              | non 0            | 0.0935        |
| Fat (%)               | 25.9              | [25.2, 26.5]   | 26.2               | [25.5, 26.9]   | 26.5               | [25.8, 27.2]   | 26.8               | [26.1, 27.5]   | 26.7               | [26.0, 27.4]              | non 0            | 0.2900        |

Estimated marginal means (emmeans) with 95% upper confidence (UCL) and lower confidence limits (LCL); emmeans within a row with <sup>abcd</sup> different superscript letters are significantly different at *p* < 0.05. <sup>1</sup>FS: 75 g flaxseed + no antioxidant sources, VE8: 75 g flaxseed + 800 mg α-tocopherol/kg, DA8: 75 g flaxseed + 800 mg *D. angustifolia* extract/kg, TS8: 75 g flaxseed + 800 mg *T. schimperi*/kg, CD8: 75 g flaxseed + 800 mg *C. domestica*/kg diet, <sup>2</sup>Sum of saturated fatty acids <sup>3</sup>Sum of monounsaturated fatty acids; <sup>4</sup>Sum of polyunsaturated fatty acids.
