# Supplementary material for: Yolk Fatty Acid Content, Lipid Health Indices, and Oxidative Stability in Eggs of Slow-Growing Sasso Chickens Fed on Flaxseed Supplemented with Plant Polyphenol Extracts
Source: MDPI journal article supplement (doi:10.3390/foods12091819), 2023-04-27
Supplement: s1 [file s1]

Table S2. The effects of feeding plant polyphenol extracts and flaxseed on fat content and fatty acid concentrations in cooked eggs of slow growing Sasso chickens

| Fatty acids<br>(mg /g) | <sup>1</sup> Treatments |                |                    |                |                     |                |                    |                |                     |                | Random<br>effect | <i>p</i> -value |
|------------------------|-------------------------|----------------|--------------------|----------------|---------------------|----------------|--------------------|----------------|---------------------|----------------|------------------|-----------------|
|                        | FS                      |                | VE8                |                | DA8                 |                | TS8                |                | CD8                 |                |                  |                 |
|                        | Mean                    | 95% [LCL, UCL] | Mean               | 95% [LCL, UCL] | Mean                | 95% [LCL, UCL] | Mean               | 95% [LCL, UCL] | Mean                | 95% [LCL, UCL] |                  |                 |
| C14:0                  | 0.79                    | [0.71, 0.85]   | 0.81               | [0.74, 0.87]   | 0.79                | [0.72, 0.85]   | 0.83               | [0.76, 0.89]   | 0.81                | [0.74, 0.87]   | non 0            | 0.8464          |
| C15:0                  | 0.15                    | [0.13, 0.17]   | 0.16               | [0.13, 0.18]   | 0.16                | [0.13, 0.18]   | 0.19               | [0.16, 0.20]   | 0.16                | [0.13, 0.18]   | non 0            | 0.2132          |
| C16:0                  | 63.9                    | [61.1, 66.7]   | 65.6               | [62.9, 68.4]   | 63.7                | [61.0, 66.5]   | 66.4               | [63.7, 69.2]   | 65.6                | [62.8, 68.3]   | non 0            | 0.5566          |
| C17:0                  | 0.46                    | [0.40, 0.52]   | 0.53               | [0.47, 0.59]   | 0.50                | [0.44, 0.56]   | 0.58               | [0.52, 0.64]   | 0.52                | [0.45, 0.57]   | non 0            | 0.1012          |
| C18:0                  | 21.7                    | [20.6, 22.8]   | 22.6               | [21.5, 23.7]   | 22.1                | [21.0, 23.2]   | 22.3               | [21.2, 23.4]   | 23.6                | [22.5, 24.7]   | non 0            | 0.16807         |
| C20:0                  | 0.02                    | [0.002, 0.04]  | 0.04               | [0.02, 0.06]   | 0.04                | [0.01, 0.06]   | 0.06               | [0.03, 0.08]   | 0.05                | [0.02, 0.06]   | non 0            | 0.2555          |
| C14:1cis-9             | 0.16                    | [0.13, 0.18]   | 0.16               | [0.12, 0.18]   | 0.16                | [0.12, 0.18]   | 0.17               | [0.13, 0.19]   | 0.16                | [0.12, 0.18]   | non 0            | 0.981           |
| C16:1cis-9             | 7.07                    | [6.27, 7.87]   | 6.99               | [6.19, 7.80]   | 6.91                | [6.11, 7.71]   | 7.43               | [6.63, 8.24]   | 7.00                | [6.19, 7.80]   | non 0            | 0.8927          |
| C18:1cis-9             | 104                     | [99.5, 107]    | 107                | [103.2, 111]   | 105                 | [101.0, 109]   | 104.0              | [100.6, 108]   | 107                 | [103.6, 111]   | non 0            | 0.54154         |
| C18:1cis-11            | 4.87                    | [4.52, 5.22]   | 4.92               | [4.57, 5.27]   | 4.84                | [4.49, 5.19]   | 5.00               | [4.65, 5.34]   | 4.82                | [4.47, 5.16]   | non 0            | 0.9473          |
| C18:1trans-11          | 0.19                    | [0.16, 0.22]   | 0.18               | [0.15, 0.21]   | 0.20                | [0.17, 0.23]   | 0.21               | [0.18, 0.23]   | 0.22                | [0.19, 0.24]   | 0                | 0.4258          |
| C18:2n-6               | 34.6                    | [31.2, 38.0]   | 35.5               | [32.1, 38.9]   | 36.4                | [33.0, 39.8]   | 38.9               | [35.5, 42.3]   | 36.0                | [32.6, 39.4]   | non 0            | 0.4476          |
| C18:3n-6               | 0.17 <sup>a</sup>       | [0.14, 0.19]   | 0.17 <sup>a</sup>  | [0.14, 0.19]   | 0.17 <sup>ab</sup>  | [0.15, 0.19]   | 0.24 <sup>b</sup>  | [0.21, 0.26]   | 0.18 <sup>ab</sup>  | [0.15, 0.20]   | non 0            | 0.00111         |
| C18:3n-3               | 6.42 <sup>a</sup>       | [5.44,7.39]    | 7.22 <sup>ab</sup> | [6.25, 8.19]   | 8.16 <sup>b</sup>   | [7.19, 9.12]   | 8.48 <sup>b</sup>  | [7.51, 9.45]   | 7.99 <sup>b</sup>   | [7.02, 8.96]   | non 0            | 0.03423         |
| C18:2 cis-9,trans 11   | 0.16                    | [ 0.12, 0.19]  | 0.14               | [ 0.10, 0.17]  | 0.19                | [ 0.15, 0.23]  | 0.20               | [0.15, 0.23]   | 0.15                | [ 0.10, 0.18]  | non 0            | 0.1365          |
| C18:4n-3               | 0.04 <sup>a</sup>       | [0.02, 0.05]   | 0.04 <sup>ab</sup> | [0.02, 0.06]   | 0.06 <sup>bc</sup>  | [0.04, 0.07]   | 0.08 <sup>c</sup>  | [0.06, 0.09]   | 0.06 <sup>bc</sup>  | [0.04, 0.07]   | non 0            | 0.00924         |
| C20:2n-6               | 0.30                    | [0.25, 0.34]   | 0.34               | [0.29, 0.37]   | 0.31                | [0.27, 0.35]   | 0.31               | [0.26, 0.35]   | 0.30                | [0.25, 0.34]   | non 0            | 0.7123          |
| C20:3n-9               | 0.05                    | [0.03, 0.07]   | 0.04               | [0.02, 0.06]   | 0.04                | [0.03, 0.06]   | 0.05               | [0.02, 0.06]   | 0.04                | [0.02, 0.06]   | non 0            | 0.9351          |
| C20:3n-6               | 0.34 <sup>a</sup>       | [0.31, 0.36]   | 0.34 <sup>a</sup>  | [0.31, 0.36]   | 0.34 <sup>ab</sup>  | [0.31, 0.37]   | 0.39 <sup>b</sup>  | [0.36, 0.42]   | 0.35 <sup>ab</sup>  | [0.32, 0.37]   | non 0            | 0.0239          |
| C20:3n-3               | 0.12 <sup>a</sup>       | [0.09, 0.14]   | 0.16 <sup>b</sup>  | [0.13, 0.18]   | 0.16 <sup>b</sup>   | [0.14, 0.18]   | 0.16 <sup>b</sup>  | [0.14, 0.18]   | 0.15 <sup>b</sup>   | [0.13, 0.17]   | non 0            | 0.04234         |
| C20:4n-6               | 4.01                    | [3.73, 4.29]   | 3.97               | [3.69, 4.25]   | 3.65                | [3.37, 3.93]   | 4.15               | [3.87, 4.43]   | 3.82                | [3.54, 4.10]   | non 0            | 0.1302          |
| C20:5n-3               | 0.17 <sup>a</sup>       | [0.13, 0.19]   | 0.17 <sup>a</sup>  | [0.14, 0.20]   | 0.19 <sup>ab</sup>  | [0.16, 0.22]   | 0.23 <sup>b</sup>  | [0.20, 0.26]   | 0.18 <sup>ab</sup>  | [0.15, 0.21]   | non 0            | 0.0165          |
| C22:4n-6               | 0.43 <sup>ac</sup>      | [0.36, 0.50]   | 0.53 <sup>ab</sup> | [0.46, 0.60]   | 0.40 <sup>c</sup>   | [0.33, 0.47]   | 0.50 <sup>c</sup>  | [0.43, 0.57]   | 0.41 <sup>c</sup>   | [0.33, 0.47]   | non 0            | 0.0397          |
| C22:5n-6               | 0.38                    | [0.27, 0.47]   | 0.35               | [0.25, 0.45]   | 0.26                | [0.16, 0.36]   | 0.31               | [0.21, 0.41]   | 0.25                | [0.15, 0.35]   | non 0            | 0.3276          |
| C22:5n-3               | 0.83 <sup>a</sup>       | [0.63, 1.02]   | 1.26 <sup>b</sup>  | [1.07, 1.45]   | 1.05 <sup>ab</sup>  | [0.86, 1.24]   | 1.44 <sup>c</sup>  | [1.25, 1.63]   | 1.05 <sup>ab</sup>  | [0.86, 1.24]   | non 0            | 0.00095         |
| C22:6n-3               | 6.06 <sup>a</sup>       | [5.70, 6.42]   | 6.74 <sup>b</sup>  | [6.38, 7.11]   | 6.56 <sup>ab</sup>  | [6.20, 6.93]   | 7.45 <sup>c</sup>  | [7.09,7.81]    | 6.67 <sup>bc</sup>  | [6.31, 7.04]   | non 0            | 0.00023         |
| <sup>2</sup> ΣSFA      | 87.1                    | [83.9, 90.4]   | 89.9               | [86.6, 93.1]   | 87.4                | [84.2, 90.6]   | 90.5               | [87.3, 93.7]   | 90.8                | [87.6, 94.0]   | non 0            | 0.32185         |
| <sup>3</sup> ΣMUFA     | 116                     | [112, 121]     | 120                | [115, 124]     | 117                 | [113, 122]     | 118                | [113, 122]     | 120                 | [115, 124]     | non 0            | 0.71882         |
| <sup>4</sup> Σ PUFA    | 54.1                    | [49.8, 58.4]   | 57.0               | [52.7, 61.2]   | 58.0                | [53.7, 62.3]   | 62.9               | [58.6, 67.2]   | 57.7                | [53.2, 62.0]   | non 0            | 0.08507         |
| Σ n-3 PUFA             | 13.6 <sup>a</sup>       | [12.40, 14.90] | 15.61 <sup>b</sup> | [14.40, 16.80] | 16.20 <sup>bc</sup> | [15.00, 17.40] | 17.90 <sup>c</sup> | [16.60, 19.10] | 16.10 <sup>bc</sup> | [14.90, 17.30] | non 0            | 0.00099         |
| Σ n-6 PUFA             | 40.2                    | [36.70, 43.70] | 41.2               | [37.70, 44.70] | 41.60               | [38.10, 45.10] | 44.8               | [41.30, 48.30] | 41.30               | [37.80, 44.80] | non 0            | 0.3988          |
| Fat (%)                | 25.7                    | [24.9, 26.6]   | 26.6               | [25.8, 27.5]   | 26.3                | [25.4, 27.1]   | 27.1               | [26.3, 27.9]   | 26.8                | [26.0, 27.7]   | non 0            | 0.18607         |

Estimated marginal means (emmeans) with 95% upper confidence (UCL) and lower confidence limits (LCL); emmeans within a row with <sup>abc</sup>different superscript letters are significantly different at  $p < 0.05$ . <sup>1</sup>FS: 75 g flaxseed + no antioxidant sources, VE8: 75 g flaxseed + 800 mg  $\alpha$ -tocopherol/kg, DA8: 75 g flaxseed + 800 mg *D. angustifolia* extract/kg, TS8: 75 g flaxseed + 800 mg *T. schimperii*/kg, CD8: 75 g flaxseed + 800 mg *C. domestica*/kg diet, <sup>2</sup>Sum of saturated fatty acids <sup>3</sup>Sum of monounsaturated fatty acids; <sup>4</sup>Sum of polyunsaturated fatty acids.
